# Supplementary material
Source: MDPI journal article supplement (https://www.mdpi.com/2073-445X/11/7/967)
Supplement: s1 [file s1]

## Artigo

# Florestas, Roças e Pastagens: Acesso Desigual à Castanha do Brasil e Estratégias de Subsistência em uma Reserva Extrativista na Amazônia Brasileira

Bruno Ubiali <sup>1,2,3,\*</sup> e Miguel Alexiades <sup>3</sup><sup>1</sup> Departamento de Antropologia, Universidade da Geórgia, 355 South Jackson Street, Athens, GA 30602, USA<sup>2</sup> Centro de Pesquisa em Conservação Integrativa, Universidade da Geórgia, 101 Herty Drive, Athens, GA 30602, USA<sup>3</sup> Escola de Antropologia e Conservação, Universidade de Kent, Giles Lane, Canterbury CT2 7NZ, UK; m.n.alexidades@kent.ac.uk

\* Correspondência: bruno.ubiali@uga.edu ou bgubiali@gmail.com

**Resumo:** Este artigo examina o acesso a um produto florestal economicamente importante (castanha do Brasil) e sua relação com estratégias de subsistência na Reserva Extrativista do Cazumbá-Iracema (RECI), Acre, Brasil. O objetivo é duplo: (i) esclarecer como funcionam os mecanismos sociais que regulam o acesso à castanha do Brasil e (ii) analisar a relação entre o acesso diferencial à castanha do Brasil e a diversificação dos meios de subsistência em termos de renda em dinheiro. Para isso, realizamos 55 entrevistas semiestruturadas com chefes de família em três comunidades de seringueiros. Nossos resultados indicam que a castanha do Brasil é importante para os meios de subsistência dos seringueiros, embora tanto o acesso à castanha do Brasil quanto as estratégias de subsistência sejam altamente variáveis entre famílias e comunidades. O acesso limitado à castanha do Brasil é parcialmente superado por meio de arranjos informais e investimentos em trabalho assalariado, agricultura itinerante e pecuária, como parte de portfólios de subsistência altamente diversificados. No entanto, as restrições à agricultura e pecuária geram tensões consideráveis entre muitos seringueiros e gestores ambientais. Destacamos a importância de se considerar a diversificação e a adaptabilidade dos meios de subsistência como componentes importantes da viabilidade de longo prazo do modelo de reserva extrativista, particularmente no contexto das crescentes incertezas e riscos associados à aceleração das mudanças climáticas e socioambientais bem como em meio à dinâmica política em curso no Brasil.

**Palavras-chave:** meios de subsistência; castanha do Brasil; reservas extrativistas; governança informal; pecuária

**Citação:** Ubiali, B.; Alexiades, M. Forests, Fields, and Pastures: Unequal Access to Brazil Nuts and Livelihood Strategies in an Extractive Reserve, Brazilian Amazon. *Land* **2022**, *11*, x. <https://doi.org/10.3390/xxxxx>

Editor Acadêmico: Charlie Shackleton

Recebido: 23 Maio 2022

Aceito: 22 Junho 2022

Publicado: date

**Publisher's Note:** MDPI stays neutral with regard to jurisdictional claims in published maps and institutional affiliations.

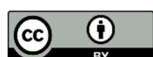

**Copyright:** © 2022 by the authors. Submitted for possible open access publication under the terms and conditions of the Creative Commons Attribution (CC BY) license (<https://creativecommons.org/licenses/by/4.0/>).

## 1. Introdução

Os produtos florestais são essenciais para a subsistência rural e fundamentais para as tentativas de conciliar o desenvolvimento econômico e a conservação das florestas nas planícies tropicais [1]. Como um dos produtos florestais não-madeireiros mais economicamente importantes, comercializados internacionalmente e uma espécie icônica da Amazônia, a castanha do Brasil (ou simplesmente castanha) (*Bertholletia excelsa*), é amplamente considerada um elemento central para a conservação baseada em meios de subsistência, particularmente em reservas extrativistas (RESEXs) e outras áreas protegidas [2,3]. Apesar de sua importância econômica e estratégica, a contribuição geral da castanha para o desenvolvimento sustentável na Amazônia é limitada por vários fatores, incluindo sua distribuição e acesso desiguais [4,5]. A relação complexa, mas pouco clara, entre acesso desigual e dependência de outras estratégias de subsistência, inclusive

a controversa criação de gado, destaca-se como uma questão que merece maior atenção [6,7].

Acesso, a “capacidade de se beneficiar das coisas – incluindo objetos materiais, pessoas, instituições e símbolos” [8] (p. 155), é moldado por fatores ecológicos – ou seja, a distribuição e abundância de recursos – e por fatores sociais como direitos de propriedade e instituições, regras e práticas informais [9]. Instrumentais na formação de meios de subsistência baseados em florestas e, conseqüentemente, centrais para a viabilidade a longo prazo das RESEXs, os regimes de acesso são, no entanto, muitas vezes mal compreendidos [2,10]. Uma melhor compreensão do papel do acesso e sua relação com padrões de exclusão social e colaboração (realizados e potenciais) é, portanto, chave para entender e apoiar o nexos vital, mas delicado, entre conservação, bem-estar social e desenvolvimento rural. [11].

Criado no Acre no final da década de 1980, o modelo de RESEX buscou garantir os direitos de terra e recursos dos extrativistas (seringueiros) com base na premissa e promessa do extrativismo de base florestal como modelo para conciliar conservação e desenvolvimento [12,13]. A suspensão dos subsídios estatais e o conseqüente colapso do mercado da borracha silvestre (*Hevea brasiliensis*, seringueira) ao mesmo tempo em que as RESEXs estavam sendo criadas no Brasil, porém, gerou um dilema existencial para os seringueiros e, conseqüentemente, para o próprio modelo de RESEX [14]. Embora a castanha tenha ajudado de certa forma a compensar isso [15], a mudança da borracha para a castanha tem sido extremamente desigual, em grande parte devido à distribuição e acesso ecológico e social desigual da última, tanto entre como dentro das RESEXs [5,16].

Nas RESEXs onde a castanha ocorre, o legado histórico da borracha continua a moldar o acesso. Por exemplo, as colocações<sup>1</sup> – unidades de propriedade florestal familiar em torno das quais a colheita da borracha silvestre foi organizada e cujo tamanho e distribuição refletem a distribuição das seringueiras – continuam sendo a base para alocar direitos de usufruto a outros recursos florestais em muitas RESEXs. São, portanto, as famílias cujas colocações possuem maior número de castanheiras que estão, em princípio, em posição econômica mais favorável, em comparação com aquelas sem acesso ou com acesso limitado [17]. Os efeitos de tal acesso desigual são ainda reforçados pela alta variabilidade na produção de castanha tanto no tempo (anualmente) quanto no espaço, com algumas árvores produzindo regularmente pouco ou nenhum fruto e outras produzindo rendimentos mais confiáveis e abundantes [18]. Ao mesmo tempo, porém, como discutiremos a seguir, algumas das instituições sociais derivadas da economia da borracha ajudam a aliviar algumas das conseqüências do acesso e distribuição desiguais por meio do compartilhamento de acesso e recursos.

Apesar da crescente demanda por castanha, muitos seringueiros foram forçados a se adaptar à perda da borracha, diversificando e aumentando sua dependência da agricultura de pequena escala, pecuária e trabalho assalariado [14,19]. Algumas dessas mudanças, e a crescente dependência do gado em particular, são fonte de tensão e conflito com gestores ambientais [20]. O desmatamento e a queima de florestas para agricultura e pecuária são vistos por muitos seringueiros como chave para sua sobrevivência econômica [21], mas considerados por outros como uma ameaça existencial ao modelo de RESEX [22]. O desmatamento é desencorajado por meio de cotas no caso da agricultura, e proibições definitivas no caso de pastagens, com multas resultantes às vezes gerando dívidas e ressentimento consideráveis [20,22]. Como discutiremos mais adiante, o clima político nacional após a eleição de Jair Bolsonaro como presidente em 2019 complicou ainda mais a relação entre seringueiros, gado, gestores ambientais e ambientalistas.

Buscamos esclarecer esse aparente impasse a partir de dados coletados em três comunidades da Reserva Extrativista do Cazumbá-Iracema (RECI), Acre, cada uma representando diferentes graus de acesso à castanha. Nosso objetivo é analisar algumas das dinâmicas que cercam o acesso desigual à castanha, incluindo como elas moldam as estratégias de subsistência. Começamos considerando o acesso diferencial à castanha em nível familiar (micro) e, em seguida, examinamos a relação entre acesso diferencial e

estratégias de subsistência (incluindo investimento em outras atividades econômicas) em nível comunitário. Nosso primeiro objetivo, então, é esclarecer se e como as regras e mecanismos sociais que regulam o acesso à castanha operam dentro da estrutura de governança existente, avaliando o papel das instituições locais e práticas informais na superação dos efeitos da desigualdade de acesso. Nossa principal preocupação aqui é esclarecer a relação entre distribuição desigual e regimes de acesso. Nossa análise em nível de comunidade, por outro lado, explora a relação entre o acesso diferencial à castanha e a diversificação dos meios de subsistência em termos de renda em dinheiro. Nosso objetivo aqui é elucidar como o acesso diferencial à castanha pode ajudar a explicar as escolhas feitas por diferentes famílias e comunidades em termos de seus portfólios de subsistência e investimento em outras atividades importantes de geração de renda. Nosso foco em dinheiro e renda aqui é explícito e intencional, não porque não consideremos dimensões não monetárias da economia doméstica como substanciais e cruciais para o bem-estar e os meios de subsistência locais [23], mas porque nossos objetivos relacionam-se especificamente à compreensão de como a necessidade de obter renda numa escala pequena, mas crítica, molda os portfólios de meios de subsistência e as atividades com foco no mercado [24].

Nossa abordagem de acesso baseia-se na literatura de propriedade comum [25,26], e particularmente na distinção de Ribot e Peluso [8] entre regras e mecanismos de acesso diretos, ou “formais” (*de jure*) e indiretos, ou “informais” (*de facto*). Para a análise dos meios de subsistência em nível comunitário, nos baseamos e procuramos contribuir para a literatura sobre produtos florestais e diversificação de meios de subsistência, em meio aos complexos ciclos e fluxos históricos que sustentam a comercialização de recursos florestais na região e a gestão social de risco e incerteza [27,28].

#### *A Reserva Extrativista do Cazumbá–Iracema (RECI)—História, Estrutura de Governança e Padrão de Ocupação*

A estrutura de governança da RECI, e das RESEXs em geral, é de certa forma híbrida, com alguns elementos implementados pelo Estado e outros derivados ou adaptados localmente da economia prévia baseada na borracha. Embora o Estado brasileiro<sup>2</sup> reconheça certos direitos coletivos, informais, residenciais e de usufruto [29], estes são mediados por uma complexa série de normas e regulamentos oficiais, incluindo restrições à agricultura, pecuária e uso do fogo [22]. Além disso, o Estado é o proprietário legal da terra, que é inalienável e indivisível [30].

Os meios de subsistência dos seringueiros são comumente organizados em torno de colocações – unidades florestais de 300 a 500 ha que foram originalmente alocadas de acordo com a distribuição das seringueiras e nas quais as famílias mantêm o usufruto e os direitos de uso da terra formalmente reconhecidos [30]. Cada uma contendo entre três e cinco trilhas de extração de borracha (estradas de seringa), as colocações constituíram a unidade básica de residência e produção econômica desde o ciclo da borracha no século XIX [31].

Grande parte da mão de obra que sustentava a economia da borracha na virada do século passado era oferecida por camponeses empobrecidos que migraram para a região, principalmente do Nordeste do Brasil [32]. Os padrões reivindicavam grandes extensões de floresta, organizando as famílias seringueiras por meio de um sistema de empréstimos antecipados e dívida crônica (aviamento) dentro de uma rede de colocações [33]. Os seringueiros e suas famílias viviam em e a partir de sua colocação individual [34], em condições de considerável precariedade, muitas vezes coercitiva.

O colapso do preço internacional da borracha no início do século XX, após a substituição por plantações do sudeste da Ásia, não dizimou inteiramente a economia da borracha na Amazônia brasileira. Os subsídios estatais permitiram que a extração de borracha continuasse, embora dentro de uma economia de subsistência muito mais diversificada em que o aviamento continuou a desempenhar um papel importante, embora menos abertamente coercitivo [15,35]. Como observamos acima, o fim desses

subsídios na década de 1990 efetivamente destruiu os resquícios da economia da borracha, que embora pequena em termos absolutos, ainda era criticamente importante para as famílias que viviam nas RESEXs recém-criadas [36]. Seja como for, a localização, o tamanho e a distribuição das colocações refletem a distribuição e as demandas de mão de obra exigidas pela colheita da borracha silvestre, e não da castanha, cuja importância econômica cresceu e cuja abundância e distribuição são diferentes da seringueira e altamente aglomeradas em povoadamentos, os castanhais.

## 2. Materiais e Métodos

### 2.1. Área de Estudo

A RECI cobre 750.000 ha no estado do Acre, Brasil (Figura 1). A maior parte da reserva é coberta por floresta tropical madura, em grande parte intocada, com sua vegetação e vida selvagem características da planície amazônica [37]. Um total de 365 famílias estão cadastradas em 11 comunidades dentro da reserva. Cada comunidade consiste em um conjunto de colocações que compartilham instalações como escolas, igrejas e centros comunitários. A maioria das pessoas vive ao longo das margens dos rios acessíveis, principalmente em áreas com castanhais adjacentes.

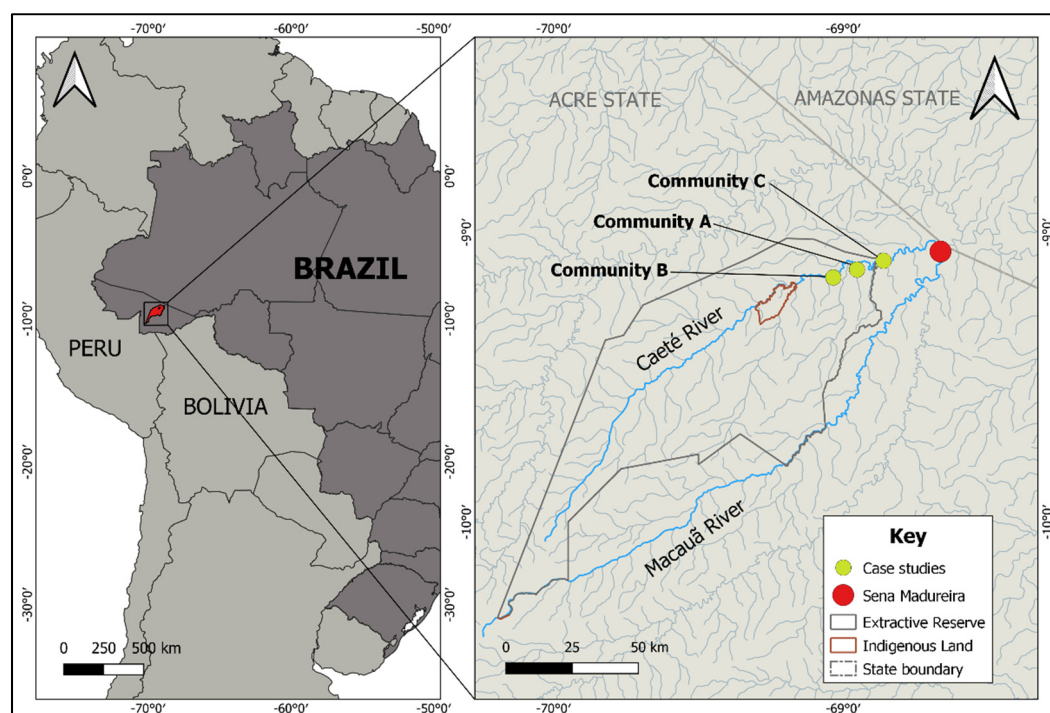

**Figura 1.** Localização da Reserva Extrativista do Cazumbá--Iracema (CIER), as três comunidades e o centro urbano de Sena Madureira.

Assim como os camponeses amazônicos em outros lugares, os meios de subsistência são caracteristicamente diversificados e dinâmicos [38]. O núcleo familiar (família) é a unidade econômica local, e a maioria das famílias pratica alguma combinação de agricultura de roça (itinerante), pecuária de pequena escala, extrativismo florestal, caça, pesca e trabalho assalariado, de maneiras que flexivelmente integram as atividades de subsistência e aquelas voltadas ao mercado e economia. Embora seja em alguns casos permitida em RESEXs, não há extração comercial de madeira *de facto* na RECI.

### 2.2. Coleta de Dados

Selecionamos três comunidades ("A", "B" e "C") ao longo do rio Caeté (Figura 1) que representam uma gama de características e condições, incluindo diferentes regimes de

acesso e abundância e dependência da castanha (Tabela 1). Todas compartilham vegetação semelhante – principalmente florestas ombrófilas abertas de terra firme e aluviais – e solos, com predominância de argissolos e luvisolos nas margens sul e norte do rio Caeté, respectivamente [39]. Embora as comunidades selecionadas sejam amplamente representativas da variedade de abundância de castanha, atividades de subsistência e condições presentes na CIER, não afirmamos que nossas descobertas podem ser diretamente extrapoladas para outras comunidades na reserva.

**Tabela 1.** Principais características das três comunidades amostradas.

| Característica         | Comunidade A                                | Comunidade B                                | Comunidade C                                |
|------------------------|---------------------------------------------|---------------------------------------------|---------------------------------------------|
| População ( <i>n</i> ) | 140                                         | 165                                         | 130                                         |
| Origem                 | Famílias de seringueiros                    | Famílias de seringueiros                    | Famílias de seringueiros e migrantes        |
| Padrão de ocupação     | Nucleado                                    | Unidades tradicionais (300-500 ha)          | Pequenas unidades (20-100 ha)               |
| História de ocupação   | 30 anos                                     | ~95 anos                                    | ~15 anos                                    |
| Castanha do Brasil     | Abundante                                   | Moderada                                    | Escassa                                     |
| Acesso à cidade        | Por rio (~4 h) com acesso sazonal por terra | Por rio (~6 h) com acesso sazonal por terra | Por rio (~2 h) com acesso sazonal por terra |

O trabalho de campo foi realizado pelo primeiro autor entre maio e junho de 2015<sup>3</sup> utilizando métodos etnográficos padrões e seguindo os princípios éticos do consentimento voluntário prévio informado, confidencialidade e anonimato. Entrevistas semiestruturadas com chefes de família foram complementadas com entrevistas informais, observação direta e observação participante, além de entrevistas com gestores governamentais. Usamos amostragem de conveniência e em bola de neve [40] (pp. 149-151) para selecionar uma amostra de 55 famílias nas 3 comunidades, representando entre 34-71% do número total de famílias e uma gama de características econômicas de cada comunidade (Tabela 2). O número de entrevistas em cada comunidade foi suficiente para permitir a saturação temática [41]. Isso, juntamente com o fato de termos amostrado entre um terço e dois terços de todas as famílias de cada comunidade, sugere que nossa coleta de dados foi capaz de capturar alguns dos temas-chave dentro da amostra do estudo, mesmo que a amostra, estritamente falando, talvez não seja estatisticamente representativa. A amostra total foi composta por 53 (96%) homens e 2 (4%) mulheres<sup>4</sup>, com idade entre 20 e 70 anos (mediana = 39)<sup>5</sup>.

**Tabela 2.** Populações de estudo e tamanhos de amostra.

| Famílias      | Comunidade A | Comunidade B | Comunidade C | Total |
|---------------|--------------|--------------|--------------|-------|
| Total         | 35           | 41           | 32           | 108   |
| Entrevistadas | 25           | 19           | 11           | 55    |
| Percentual    | 71           | 46           | 34           | 51    |

Visitamos as famílias para a realização das entrevistas semiestruturadas em suas colocações, onde também realizamos observações diretas com foco nos usos do solo adotados pelos entrevistados. As entrevistas semiestruturadas foram realizadas em português e focaram em duas questões-chave: (i) o grau e a forma de acesso à castanha; e (ii) a importância relativa da castanha e outras fontes primárias de renda em dinheiro<sup>6,7</sup>. Entre os entrevistados com acesso à castanha, coletamos detalhes sobre a colheita, incluindo quem colhe, números de produção, estratégia de transporte e vendas, dentre outros (Anexo 1). Além disso, exploramos restrições ou limitações associadas às principais fontes de renda das famílias. Também realizamos frequentes entrevistas informais e

participamos de diversas confraternizações e reuniões comunitárias, que faziam parte da vida social dos seringueiros e, portanto, também do pesquisador imerso em suas realidades. Sempre que possível, acompanhamos as pessoas em suas atividades diárias (por exemplo, extração de borracha, manejo de roça), o que forneceu contexto e dados adicionais importantes.

### 2.3. Análise de Dados

Utilizamos o programa NVivo (Versão 10<sup>®</sup>) para organizar, transcrever seletivamente, codificar e identificar temas-chave nos dados de observação e entrevista. Em seguida, usamos um programa de planilha para calcular as frequências relativas e visualizar os dados sobre acesso e atividades de subsistência. Para a análise dos meios de subsistência, baseamo-nos nos relatos dos participantes sobre as suas fontes de rendimento primárias e complementares, o que nos permitiu caracterizar e tabular os portfólios de subsistência dos núcleos familiares numa matriz de perfis. Finalmente, reunimos nossos dados domiciliares para caracterizar os padrões a nível de comunidade.

Dependendo do nível de acesso à castanha, referimo-nos às famílias como “proprietários” (acesso direto), “usuários autorizados” (acesso indireto) ou “sem acesso”<sup>8</sup> [8,26]. Classificamos a colheita da castanha como “de subsistência” quando as famílias consomem os rendimentos internamente e como “comercial” quando vendem a produção, embora as famílias consumam parcialmente esta última.

## 3. Resultados

Apresentamos nossos resultados em duas partes. Em primeiro lugar, examinamos o acesso à castanha a nível familiar, descrevendo como o acesso é estruturado em cada comunidade amostrada, prestando atenção especial aos mecanismos informais através dos quais as barreiras ao acesso são socialmente negociadas e/ou contornadas. Em seguida, apresentamos uma breve visão comparativa dos perfis de subsistência das comunidades, considerando a importância das fontes primárias de renda identificadas – castanha, agricultura, trabalho assalariado e pecuária – em relação ao acesso diferenciado à castanha e entre si.

### 3.1. Colheita e Acesso Diferencial à Castanha

A colheita começa na estação chuvosa (inverno), entre janeiro e fevereiro, quando todos os frutos já caíram no solo. Os coletores, geralmente homens, chegam aos locais de colheita – entre 500 e 5.000 m de distância de suas casas – principalmente a pé. Eles primeiro juntam as frutas em pilhas e as abrem com facões. Depois de ensacar as castanhas com casca, os coletores transportam os sacos para portos fluviais (em igarapés ou rios) a pé ou, em alguns casos, usando animais de carga. As castanhas são então transportadas por via fluvial<sup>9</sup> para o mercado, onde as famílias vendem a sua produção a intermediários.

No geral, a castanha do Brasil é o produto florestal de maior valor comercial e o elemento central da economia extrativista da RECI. Apesar da curta temporada de colheita – máximo de dois meses – cerca de metade das famílias amostradas (55 %, n = 30) obtêm algum rendimento da sua colheita, representando um valor bruto total superior a USD 30.000 por ano (Tabela 3). No entanto, apenas uma família depende da castanha como fonte primária de renda (2%) e, talvez mais significativamente, 31% de todas as famílias (n = 17) não têm acesso (Figura 2).

**Tabela 3.** Número aproximado de castanheiras, produção anual e receita bruta da colheita por castanhal nas três comunidades (C-gr: colheita comercial por um grupo de famílias; C-ind: colheita comercial por famílias individuais; S: colheita de subsistência por famílias individuais).

| Comunidade/Castanhal          | Árvores (n) | Produção (t) |      | Receita bruta (mil USD) |      |
|-------------------------------|-------------|--------------|------|-------------------------|------|
| Community A *                 |             | 2014         | 2015 | 2014                    | 2015 |
| Castanhal 1 – "Reserva"(C-gr) | 300         | 4.5          | 6.7  | 3.1                     | 6.6  |

|                      |             |             |             |             |             |
|----------------------|-------------|-------------|-------------|-------------|-------------|
| Castanhal 2 (C-gr)   | 180         | 5           | 10          | 3.4         | 9.8         |
| Castanhal 3 (C-gr)   | 150         | 0.9         | 1.5         | 0.5         | 1.5         |
| Castanhal 4 (C-gr)   | 120         | 0.8         | 1           | 0.6         | 1           |
| Castanhal 5 (C-ind)  | 90          | 2.8         | 2.6         | 2.4         | 2.5         |
| Castanhal 6 (C-ind)  | 55          | 0.7         | 1.1         | 0.5         | 1           |
| Castanhal 7 (C-ind)  | 36          | 0           | 0.6         | 0           | 0.6         |
| Castanhal 8 (C-gr)   | 25          | 0.2         | 0.7         | 0.2         | 0.7         |
| <i>Subtotal</i>      | <i>956</i>  | <i>14.9</i> | <i>24.2</i> | <i>10.7</i> | <i>23.7</i> |
| <b>Community B *</b> |             |             |             |             |             |
| Castanhal 1 (C-gr)   | 120         | 6.8         | 7           | 4.4         | 6.9         |
| Castanhal 2 (C-ind)  | 80          | 0.7         | 2           | 0.5         | 2           |
| Castanhal 3 (C-ind)  | 32          | 0.1         | 0.2         | 0.1         | 0.2         |
| Castanhal 4 (C-ind)  | 20          | 0.4         | 0.5         | 0.3         | 0.5         |
| Castanhal 5 (S)      | 10          | -           | -           | -           | -           |
| Castanhal 6 (S)      | 10          | -           | -           | -           | -           |
| Castanhal 7 (S)      | 6           | -           | -           | -           | -           |
| Castanhal 8 (S)      | 2           | -           | -           | -           | -           |
| Castanhal 9 (S)      | 1           | -           | -           | -           | -           |
| <i>Subtotal</i>      | <i>281</i>  | <i>8</i>    | <i>9.7</i>  | <i>5.3</i>  | <i>9.6</i>  |
| <b>Community C *</b> |             |             |             |             |             |
| Castanhal 1 (C-gr)   | 18          | 0.3         | 0.4         | 0.2         | 0.3         |
| Castanhal 2 (S)      | 5           | -           | 0.1         | -           | 0.1         |
| Castanhal 3 (S)      | 8           | -           | -           | -           | -           |
| Castanhal 4 (S)      | 4           | -           | -           | -           | -           |
| <i>Subtotal</i>      | <i>35</i>   | <i>0.3</i>  | <i>0.5</i>  | <i>0.2</i>  | <i>0.4</i>  |
| <b>Total</b>         | <b>1272</b> | <b>23.2</b> | <b>34.4</b> | <b>16.2</b> | <b>33.7</b> |

\* Comunidade A: n = 25; comunidade B: n = 19; comunidade C: n = 11.

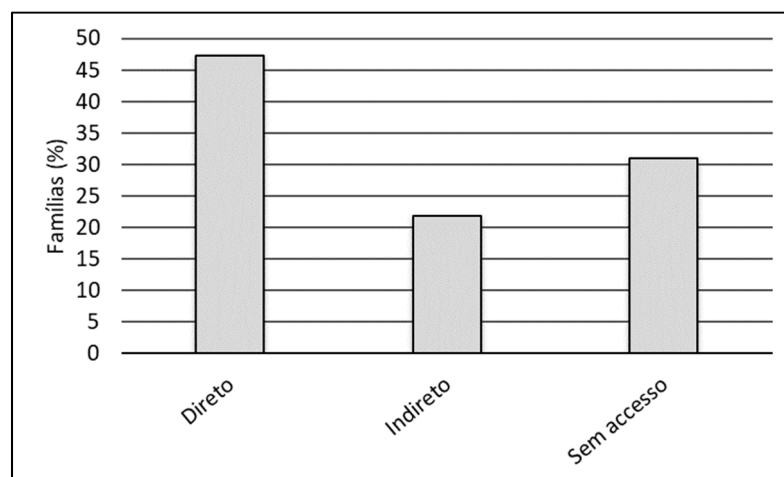

**Figura 2.** Percentual de famílias com acesso direto, indireto e sem acesso à castanha, agregado para as três comunidades (comunidade A: n = 25; comunidade B: n = 19; comunidade C: n = 11).

Como já antecipamos, esse acesso altamente desigual à castanha como fonte primária de renda se deve aos efeitos combinados de fatores ecológicos, sociais e históricos. A castanha, semelhante à maioria dos produtos florestais amazônicos, tem uma distribuição altamente desigual<sup>10</sup>; nas áreas de floresta de terra firme, não alagada, madura, de dossel fechado onde crescem, suas densidades variam de 1,5 a 3 ou mais árvores por hectare<sup>11</sup>. Apenas as famílias cujas colocações incluem povoamentos produtivos (castanhais) podem praticar a colheita comercial: os restantes núcleos familiares estão efetivamente excluídos, a menos que cheguem a um acordo informal que lhes permita uma parte da colheita (ver abaixo). No geral, 47% (n = 26) das famílias amostradas têm acesso direto (*de jure*) à

castanha, enquanto outros 22% ( $n = 12$ ) o fazem por meio de mecanismos indiretos (*de facto*) (Figura 2). Descrevemos agora esses dois regimes de acesso e como o acesso e a colheita são organizados em cada um deles (Tabela 4).

**Tabela 4.** Tipos de acesso à castanha do Brasil e esquemas de colheita associados.

| Tipo de Acesso | Termo              | Esquema de Colheita |                    | Relação Social   |
|----------------|--------------------|---------------------|--------------------|------------------|
| Direto         | Proprietário       | Divisão de trabalho | Divisão de árvores | Parente          |
| Indireto       | Usuário autorizado | Meia                | Subsistência       | Parente ou amigo |

### 3.1.1. Acesso Direto (*De Jure*)

Conforme observado acima, os direitos de acesso à castanha são frequentemente baseados nas colocações historicamente alocadas com base na seringueira<sup>12</sup>. Esses direitos de usufruto, herdados tanto por linha paterna quanto materna, são amplamente consuetudinários<sup>13</sup> e amplamente respeitados. Embora os coletores sejam geralmente homens, os direitos de usufruto são herdados pelas crianças, independentemente do sexo, geralmente ao estabelecer sua própria família. A unidade básica de produção e colheita econômica na RECI é a família e, como observado anteriormente, nos referimos às famílias que possuem acesso direto como “proprietários”. Se um novo núcleo familiar herdar direitos de acesso de ambos os lados da família, ele reterá acesso apenas aos castanhais de um lado. Além disso, descendentes de proprietários que moram fora da reserva geralmente perdem seus direitos de acesso, principalmente se obtiverem outros meios de renda.

O acesso às colocações familiares é compartilhado pelos proprietários e organizado de duas formas. Na maioria das vezes (56% dos proprietários,  $n = 9$ ), particularmente nos grandes castanhais, todas as famílias proprietárias colhem conjuntamente e partilham os lucros igualmente. Em outros casos (19% dos proprietários,  $n = 3$ ), geralmente nos castanhais de médio porte, os proprietários decidem dividir o castanhal entre as famílias, dando a cada família acesso a um número similar de árvores, de forma que cada família individual assume a propriedade e a responsabilidade pela colheita na sua própria parte (Figura 3). Por outro lado, 25% ( $n = 4$ ) dos proprietários terceirizam parte ou toda a sua colheita para famílias sem acesso direto por meio de uma série de arranjos flexíveis, variáveis e dinâmicos, conforme descrevemos a seguir.

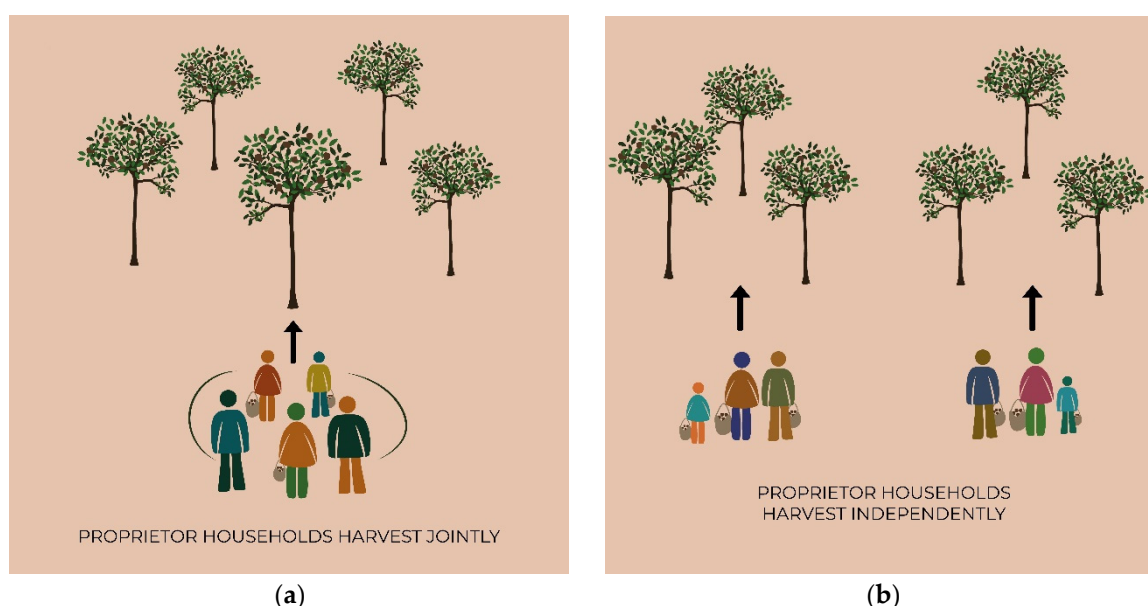



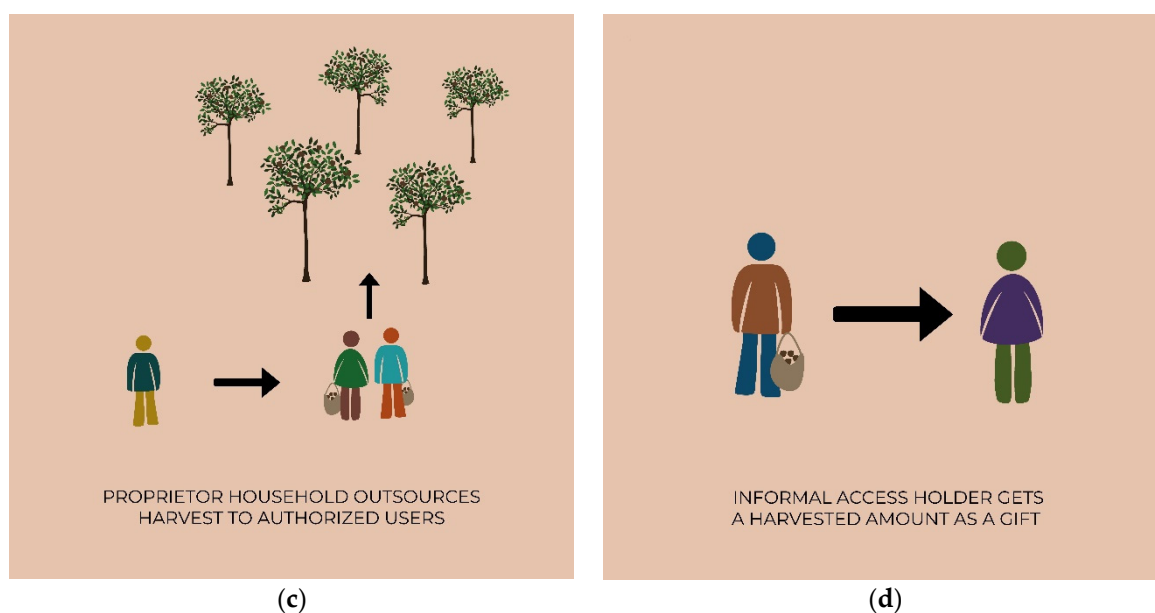

**Figure 3.** Acordos de acesso direto (a,b) e indireto (c,d) à castanha. (a) Todas as famílias proprietárias colhem conjuntamente e compartilham os lucros igualmente. (b) O acesso é compartilhado igualmente entre os proprietários, com cada família assumindo a propriedade e a responsabilidade pela colheita em sua seção alocada. (c) Os proprietários terceirizam a colheita de castanhais para parentes ou amigos total ou parcialmente. (d) Proprietários dão a parentes ou amigos uma pequena quantia colhida como presente (mais detalhes no texto) (ilustração: Carolina Guyot).

### 3.1.2. Acesso Indireto (De Facto)

Existem várias instituições ou mecanismos sociais “informais” que ajudam a mitigar os efeitos da distribuição altamente desigual e do acesso à castanha entre colocações e famílias. Referimo-nos às famílias que recebem esse acesso indireto, *de facto*, como “usuários autorizados”. Os direitos de acesso indireto à colheita comercial são concedidos pelos proprietários na maioria das vezes por meio do contrato de trabalho “meia”. Nesse caso, os proprietários terceirizam parcialmente, às vezes inteiramente, a colheita de um ou mais castanhais para parentes ou amigos. Semelhante a um sistema de parceria, os usuários autorizados mantêm metade de sua colheita, entregando aos proprietários a outra metade. O sistema meia é mais comumente empregado por famílias proprietárias com acesso abundante à castanha ou a outros fluxos de renda significativos. Os contratos de meia podem ser pontuais ou utilizados de forma consistente ao longo dos anos. Alternativamente, ou adicionalmente, os proprietários também podem doar uma pequena parte de sua colheita a famílias sem acesso. Novamente, há considerável flexibilidade em como os arranjos são feitos no espaço e no tempo, uma vez que operam dentro de uma grande rede de trocas e são subscritas por um etos em que o compartilhamento, a reciprocidade e a cooperação são socialmente valorizados e publicamente incentivados e de maneiras que permitem que as famílias se adaptem às mudanças nas circunstâncias e oportunidades em diferentes comunidades, e ao longo do tempo.

### 3.1.3. Diferenças de Acesso entre Comunidades

O acesso à castanha— em geral, bem como nas proporções de acesso direto e indireto — varia consideravelmente entre as comunidades (Figura 4). A elevada ocorrência natural de castanha e a existência de um esquema inovador de participação e partilha comunitária na comunidade A<sup>14</sup>, por exemplo, fazem com que a maioria dos núcleos familiares (92%) nessa comunidade tenham algum acesso, quer diretamente (52%) ou indiretamente (40%), e todas as famílias comercializam a sua produção. A falta de participação na colheita da castanha entre algumas famílias (8%) na comunidade A não se deve a nenhuma barreira

de entrada, mas sim à existência de fontes alternativas de renda, especificamente trabalho assalariado e aposentadorias.

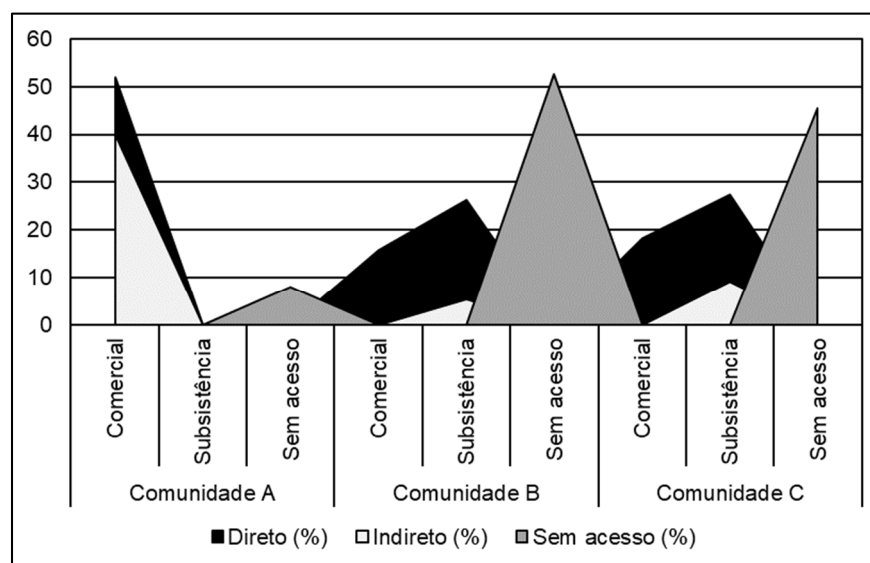

**Figura 4.** Tipos de acesso à castanha nas três comunidades (comunidade A: n = 25; comunidade B: n = 19; comunidade C: n = 11). Nota: parte da safra “comercial” pode ser utilizada para consumo local, dependendo do ano e da necessidade.

Nas comunidades B e C, em contraste, apenas cerca de metade das famílias amostradas têm algum tipo de acesso – principalmente direto. Além disso, em ambas as comunidades, há uma alta porcentagem de famílias sem nenhum acesso (53% na comunidade B e 46% na comunidade C) e, em contraste com a comunidade A, uma proporção considerável da colheita nessas duas comunidades (32% e 36% respectivamente) é usada principalmente para subsistência. A importância da colheita orientada para a subsistência nas comunidades B e C em comparação com A pode estar relacionada a diferenças na distribuição e abundância do recurso em uma escala micro. Na Tabela 3, listamos o tamanho, produção e tipo de colheita dos principais castanhais em cada comunidade. Esses dados sugerem que castanhais com menos de dez árvores não são utilizados comercialmente, e apenas aqueles com mais de 180 árvores são significativos o suficiente para se tornarem uma fonte primária de renda para as famílias proprietárias<sup>15</sup>.

### 3.2. Comparação entre Meios de Vida na RECI

Assim como no acesso à castanha, existem diferenças consideráveis nos perfis de subsistência das três comunidades. Resumimos nossos resultados agregando distribuição de renda e portfólios de subsistência por atividade (Figura 5) e depois por comunidade (Figura 6). Embora a castanha esteja presente nas estratégias de renda de cerca de metade de todas as famílias (55%), ela raramente constitui uma fonte primária de renda (2%). No geral, a pecuária e a agricultura são as mais importantes, tanto em termos de presença nas estratégias de subsistência das famílias (71% e 67%, respectivamente) quanto como fontes primárias de renda (22% e 35%, respectivamente). A renda direta por meio de empregos como professores, motoristas, trabalhadores agrícolas externos ou por meio de aposentadorias tem uma distribuição mais baixa (41%) do que a pecuária, agricultura e castanha na estratégia de renda de todas as comunidades em geral, mas entre as famílias em que é presente, tende a representar também a principal fonte de renda (34%).

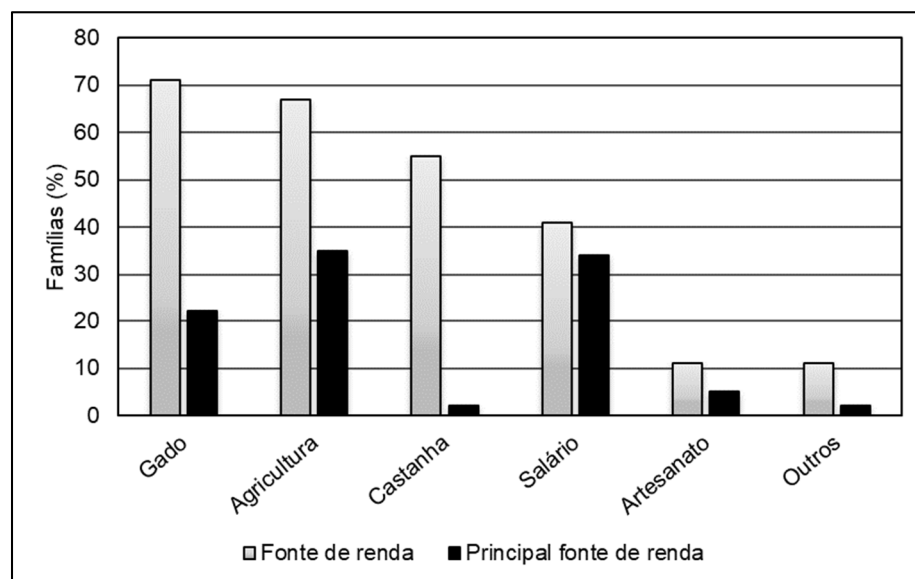

**Figure 5.** Frequência relativa das fontes primárias de renda realizadas pelas famílias nas três comunidades (Trabalho assalariado: professores, motoristas, trabalhadores rurais e aposentados; outros: trabalho local esporádico, programas governamentais de transferência de renda Bolsa Família e Bolsa Verde; comunidade A: n = 25; comunidade B: n = 19; comunidade C: n = 11).

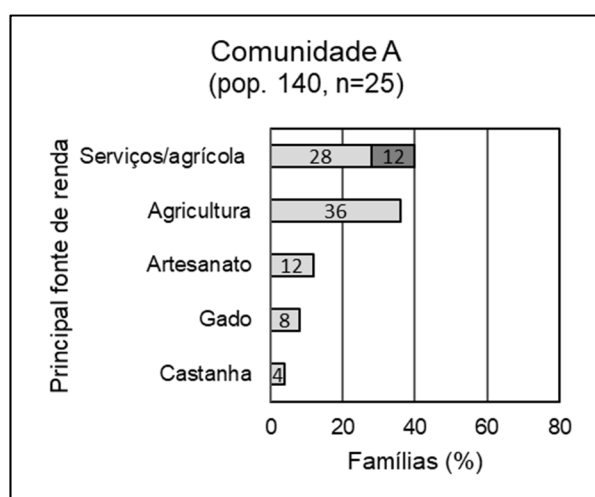

(a)

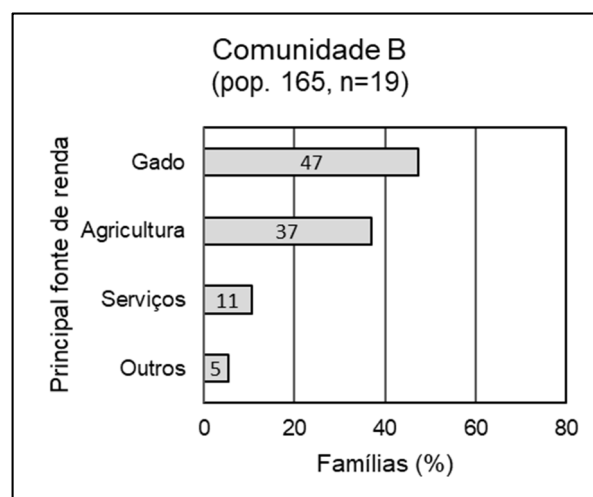

(b)

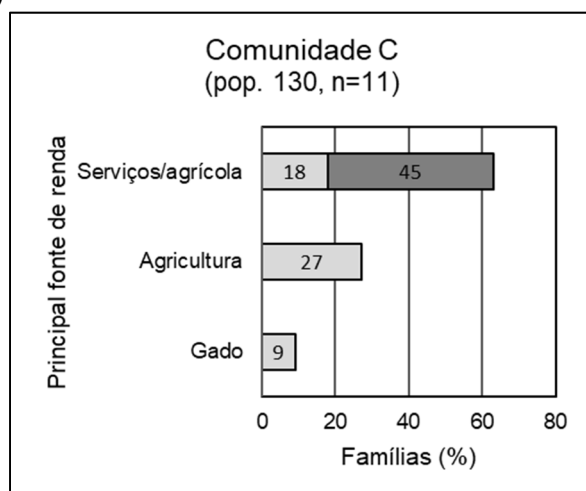

(c)

**Figura 6.** Frequência relativa das três fontes primárias de renda para famílias individuais nas comunidades A (a), B (b) e C (c) (Serviços: professores, motoristas e aposentados; Trabalho agrícola: trabalho em fazendas fora da reserva; comunidade A: n = 25; comunidade B: n = 19; comunidade C: n = 11).

Nossos resultados indicam diferenças consideráveis nas fontes de renda primária entre as comunidades (Figura 6). A única constante relativa entre as três comunidades é a venda de produtos agrícolas, especificamente a farinha de mandioca (farinha), que representa cerca de 30% de toda a renda primária em todos os casos. O trabalho assalariado, desagregado em trabalho de serviço (pensões e salários do Estado, motoristas de barco) e trabalho agrícola (trabalho manual em fazendas fora da reserva), fornece a fonte de renda mais importante em duas comunidades (40% na comunidade A, 64% na comunidade C). O gado parece ter uma relação inversa com o trabalho assalariado como fonte primária de renda: serve como fonte primária de renda para apenas 10% das famílias nas comunidades A e C, enquanto na comunidade B, serve como fonte primária de rendimento para quase metade das famílias (47%), novamente em contraste com o trabalho assalariado (11%).

#### 4. Discussão

Embora a castanha seja claramente importante para a economia regional de subsistência e para a identidade tanto do modelo de RESEX quanto dos extrativistas [43], em termos monetários, sua importância relativa na RECI e em outros lugares [44,45], é bastante desigual e majoritariamente complementar. A constatação de que a castanha e o extrativismo florestal em geral desempenham um papel desigual – e às vezes pequeno – ao permitir que as famílias dentro das RESEX se envolvam de maneira sustentável com a economia de mercado fica aquém das expectativas originalmente projetadas, talvez de forma irreal, sobre os produtos florestais, pelo menos no que diz respeito às dimensões monetárias dos meios de subsistência e da economia local [46,47]. Semelhante a outros produtos florestais, e apesar de seu valor e importância econômica global, a importância econômica local da castanha é limitada por seu acesso, distribuição e rendimentos desiguais, dentre outros fatores [5,18].

O acesso desigual à castanha apresenta vários desafios existenciais interligados e em camadas para a governança e viabilidade da RECI e seu modelo extrativista. Primeiro, contribui para uma sensação generalizada e corrosiva de injustiça entre as famílias sem acesso – cerca de um terço de todas as famílias amostradas em nosso estudo – particularmente em comunidades onde outros têm acesso direto, extensivo e onde os regimes *de facto* não conseguem mitigar os efeitos dessa desigualdade. Os entrevistados descrevem o que consideram um arranjo injusto e uma oportunidade econômica limitada ou perdida:

“Castanha a gente não tem não. E assim, o dinheiro é muito pouco que a gente pega dessa castanha, muito pouco mesmo. E é uma vez no ano. Então o problema da castanha é esse: a gente não tem castanha.” (Usuário autorizado da comunidade A)

“A castanha não tem em todo canto. Aqui tem pouca. Tem canto que nem tem. Aqui mesmo na minha terra tem quatro árvores só de castanha. Essas eu uso só pro consumo mesmo.” (Proprietário da comunidade C)

Em segundo lugar, as famílias, e especialmente as comunidades, com acesso limitado à castanha tornam-se necessariamente mais dependentes de outras fontes de renda. Por exemplo, as famílias sem acesso dependem principalmente da pecuária (44%), do trabalho assalariado (38%) e da venda de farinha de mandioca (19%), a primeira e a última que, como vimos, são desincentivadas por gestores ambientais e regulamentos da reserva. Assim, a queixa devido à falta de acesso à castanha se combina com um sentimento de

incapacidade de realizar atividades básicas de subsistência e a sensação de que as intervenções do Estado são punitivas e não de apoio:

“Nem brocar o cara pode. Pode brocar aquele pedacinho de área só pra um roçado bem pequenininho. Pra pasto ninguém pode brocar e nem pode queimar o pasto. Se queimar é uma multa que o cara não pode nem pagar.”

“Depois que a seringa não deu nada e nem a farinha, começamos a se manter da rendazinha desse gado. Então o sustento que nós estamos tendo hoje é desse gado, e estão querendo tirar o nosso gado.”

Mesmo as famílias com algum acesso à castanha contam com esses fluxos de renda adicionais como forma de alcançar algum nível de segurança econômica e resiliência em meio a rendimentos anuais variáveis (ou seja, o acesso desigual ao longo do tempo), particularmente nos anos em que a produção é praticamente zero (Tabela 3).

Agora nos concentramos em cada um desses aspectos e dimensões do acesso desigual. Em primeiro lugar, examinamos as questões específicas que cercam a colheita da castanha a nível intracomunitário, particularmente em termos da teoria de acesso de Ribot e Peluso [8]. Em seguida, nos concentramos na relação entre o acesso e distribuição da castanha e outros fluxos geradores de renda – gado e agricultura especialmente – dentro de uma dinâmica intercomunitária mais ampla e segurança econômica familiar. Em terceiro lugar, consideramos a relação complexa, contenciosa e tensa entre a pecuária, a colheita da castanha, os meios de subsistência e a Reserva. Concluímos com algumas observações sobre as implicações mais amplas e políticas de nossas descobertas em meio a riscos e incertezas sociais, econômicos e ambientais contínuos e provavelmente crescentes.

#### 4.1. Compreendendo o Acesso Desigual à Castanha na RECI

As várias regras formais e informais que operam dentro da reserva têm efeitos diversos sobre a distribuição desigual da castanha no espaço e seus rendimentos variáveis no tempo. Os direitos de usufruto associados a colocações orientadas para a borracha fazem pouco e, de certa forma, agravam os efeitos da distribuição desigual do acesso. Por outro lado, as regras e práticas costumeiras relativas à herança e partilha de direitos de usufruto ampliam o acesso social e reduzem as desigualdades entre as famílias. A aparente ausência de roubo de colheitas [17], violações de acesso [48], ou conflitos de acesso com outros grupos sociais [49], podem ser indicativos da eficácia de tais mecanismos informais de acesso na RECI, e é condizente com o modo cooperativo em que as famílias tendem a interagir umas com as outras, particularmente dentro de grandes grupos familiares. Os benefícios proporcionados pelo acesso indireto por meio de práticas como a meia, além disso, vão além daquelas relacionadas à economia de mercado, pois a castanha também desempenha um papel importante na economia de subsistência, não monetária, fornecendo uma rede de segurança e contribuindo para a segurança alimentar e resiliência das famílias em tempos de necessidade [50,51].

Por outro lado, a variabilidade da produção entre os anos e a baixa produtividade das árvores em alguns anos – às vezes perto de zero (Tabela 3) – apresenta um desafio considerável para todas as famílias, incluindo aquelas com acesso direto [18,52]. Essas inconsistências de rendimento podem ser um fator que explica o fato de que a castanha raramente constitui a principal fonte de renda para as famílias, mesmo para aquelas com acesso considerável, um risco que parece ser mitigado através do investimento em fontes alternativas de renda, como discutiremos na próxima seção.

Em um nível teórico, a “Teoria do Acesso” de Ribot e Peluso [8] e sua distinção entre direitos (propriedade, *de jure*) e habilidades (*de facto*, acesso) fornecem uma lente útil através da qual considerar “as constelações de meios, relações e processos que permitem que vários atores obtenham benefícios dos recursos” (p. 153). No entanto, ao contrário de muitos outros produtos florestais comercialmente importantes [27,53], as barreiras à entrada da castanha na RECI não são múltiplas e complexas e são determinadas

principalmente pelo acesso físico ao recurso natural, uma barreira que como vimos é resultado de fatores geográficos e circunstâncias históricas e isso resulta em diferenças consideráveis no acesso entre e mesmo dentro das comunidades. Tal desigualdade cria um dilema moral e, portanto, político, dado o ethos geral de sociabilidade e reciprocidade e a aversão à acumulação individual de riqueza e poder que permeia muitas redes de trocas sociais e econômicas de caboclos, indígenas e seringueiros da Amazônia. O acesso desigual à castanha na RECI não só gera um sentimento de ressentimento e mágoa entre os excluídos, mas talvez também um sentimento complementar de mal-estar entre os incluídos, talvez especialmente porque as barreiras à entrada são arbitrárias e recentes:

“Tem um senhor ali, ele é a única pessoa, mais o filho dele, que não tem muito acesso. Eu disse pra ele: “Tu quebra o meu castanhal de metade mais o teu filho.” E eu faço isso pra ajudar. Então ele fica muito grato porque ele se beneficia. E isso é a maneira que a gente pode ajudar uns aos outros.”

Como Ribot e Peluso [8] nos lembram, “Os benefícios são importantes porque as pessoas, instituições e sociedades vivem deles e para eles e se chocam e cooperam sobre eles” (p. 155). As relações sociais e econômicas dos seringueiros são intrinsecamente dialógicas *sensu* Morin [54]; ou seja, são ao mesmo tempo complementares, competitivas e antagônicas e, além disso, incidem de forma importante na forma como o acesso à castanha é mediado entre os seringueiros da RECI. Isso não só porque os proprietários têm uma obrigação moral para com aqueles que não têm acesso, mas também porque a maneira pela qual o acesso à castanha é negociado faz parte de uma rede muito maior e complexa de trocas e relações, incluindo casamento e descendência, os quais estão envolvidos em noções amazônicas profundamente enraizadas de sociabilidade e convívio [55,56]. Essa obrigação de compartilhar, nesse caso, é um exemplo do que Ribot e Peluso [8] chamam de “mecanismo estrutural e relacional de acesso” (p. 170) baseado na identidade social, que sem dúvida transcende o binário propriedade-acesso pois constitui simultaneamente uma forma de “lei moral” e parte do conjunto de direitos relativos ao usufruto dos recursos naturais, assim como uma estrutura para ampliar socialmente a capacidade de acesso à castanha para além dos estritos limites concedidos historicamente pela instituição social da colocação herdada e validada pelo Estado.

#### 4.2. Integrando o Acesso à Castanha e as Estratégias de Subsistência

O papel da renda e do dinheiro é um pouco circunscrito dentro da economia extrativista híbrida da RECI, particularmente dada a prevalência e importância da subsistência não-mercantil e das trocas não mediadas pelo mercado. Embora talvez pequenas em termos absolutos, as rendas baseadas em dinheiro são extremamente importantes – talvez cada vez mais – para comprar bens ou serviços manufaturados essenciais e desejados, incluindo aqueles relacionados à saúde e educação. Fundamentalmente, o acesso ao dinheiro também ajuda a superar choques e surpresas – uma doença súbita ou morte na família ou uma inundação que destrói plantações, por exemplo. É neste contexto mais amplo da economia familiar e, em particular, na sua resiliência e segurança, que procuramos esclarecer o papel e as restrições da castanha, especificamente em relação a outras vertentes geradoras de rendimentos, especificamente a pecuária, agricultura e trabalho assalariado.

O grau de acesso ao mercado pode ajudar a explicar algumas das principais diferenças nos meios de subsistência e estratégias de geração de renda das três comunidades (Tabela 1) [57,58]. Foi a combinação de abundantes reservas de castanha e uma proximidade estratégica com a cidade e o mercado local que levou à migração de muitas famílias de seringueiros para a comunidade A na década de 1990 e a uma decisão interna de dividir a terra em uma série de lotes que incluíam regras como a proibição formal de derrubar florestas para pastagem, por exemplo. O acesso simultâneo à castanha e ao mercado na comunidade A também pode ajudar a explicar a adoção limitada de gado, principalmente devido à forma como os mecanismos *de facto* ajudam a ampliar o acesso às famílias menos privilegiadas (Figura 4). O fácil acesso da comunidade C à cidade e ao

mercado (Tabela 1) sem dúvida mitigou os desafios apresentados pela falta de castanheiras ao permitir que as famílias obtivessem renda através do trabalho assalariado. Observamos que é justamente na comunidade B, que tem acesso mais limitado à cidade e à castanha, que a pecuária ganhou maior destaque (Figura 67).

Embora também seja um fator crucial para a comercialização de produtos florestais na Amazônia [24], a maioria dos entrevistados não mencionou o acesso às rotas de transporte como uma grande preocupação e barreira de entrada para a comercialização de castanha. Apesar das importantes distinções de acessibilidade mencionadas anteriormente entre as três comunidades, elas são relativamente próximas umas das outras e do mercado (Figura 1; Tabela 1), o que pode significar que os custos de transporte para um produto de alto valor como a castanha não sejam excessivos. Além disso, apesar dos desafios do transporte terrestre, a ampla presença de igarapés sazonais facilita o acesso a rotas aquáticas para o mercado durante a estação chuvosa.

Por sua vez, o duplo valor da mandioca como um alimento básico de subsistência e uma mercadoria a torna um bem extremamente valioso dentro do portfólio de subsistência diversificado e flexível dos moradores da floresta [59]. Isso pode explicar sua alta relevância econômica e consistente nas três comunidades – cerca de um terço das famílias dependem principalmente do comércio de mandioca – em contraste com o gado, cuja contribuição varia muito entre as comunidades. A menor barreira de entrada para a agricultura em comparação com o gado – as famílias podem desmatar um hectare de floresta anualmente para a agricultura, mas nenhum para o gado – é provavelmente outro fator que explica a dependência consistente da agricultura nas três comunidades. A agricultura é a atividade econômica mais importante na comunidade A, onde a castanha é mais abundante. No entanto, a alta variabilidade dos preços locais da farinha, em contraste com o gado, mas de certa forma semelhante à castanha, limita um pouco sua importância econômica e, portanto, traz alguma incerteza na medida em que sua capacidade de fornecer uma rede de segurança em tempos de imprevistos e necessidade.

O acesso à terra pode ser outro fator que molda o investimento diferencial em gado entre as comunidades [34,60]. A já mencionada redistribuição de terras e padrão nucleado na comunidade A restringe o acesso à terra para novos moradores, principalmente para o desenvolvimento de pastagens. Os efeitos combinados da escassez de castanha e a presença de grandes colocações na comunidade B, em contraste, podem ter tornado o investimento em gado mais desejável. Em contraste, pequenas propriedades na comunidade C limitam criticamente a expansão do rebanho com rebanhos necessariamente menores (até 15 cabeças) para uso em caso de emergência.

#### *4.3. Reavaliando o Papel do gado na RECI e nas Reservas Extrativistas*

Semelhante a outros camponeses amazônicos [7,10] e seringueiros em outras RESEXs [20,34], as famílias da RECI dependem do gado como forma de construir suas economias e capital e alcançar alguma medida de segurança econômica, com pequenos rebanhos desempenhando um papel fundamental na economia familiar do seringueiro e contribuindo para a resiliência socioecológica. Um respondente explica:

“Pra gente viver só do extrativismo, ele precisaria ser valorizado. E não é. Se tivesse alguma coisa pra substituir o gado, a gente abandonaria ele na hora. Mas se não tiver, nós vamos fazer o quê?”

Os preços constantes, se não crescentes, da carne bovina ajudam a mitigar os efeitos de rendimentos ou preços instáveis da castanha ou da farinha e fornecem alguma proteção contra custos inesperados relacionados à saúde ou educação. O fato de que hoje a pecuária é mais importante onde a castanha é escassa sugere que o gado está ajudando a preencher uma lacuna deixada no extrativismo florestal após o colapso da borracha e em meio às limitações da castanha.

Em contraste com outros estudos [44,61], nossos resultados não sustentam a noção de que maior acesso à renda através da colheita de castanha necessariamente se traduz em maiores investimentos em atividades agrícolas: maior acesso à castanha na

comunidade A parece ter restringido, e não aumentado, o investimento e apoio ao gado [34,62]. Por sua vez, muitos seringueiros não veem competição ou antagonismo entre o gado e a agricultura como a praticam e a castanha. As pessoas insistem em não desmatar áreas com castanha para plantações ou pastagens, garantindo que castanhas permaneçam em áreas conservadas de floresta de terra firme. Tal escolha faz sentido tanto do ponto de vista cultural quanto econômico, pragmático, e vai ao encontro da indignação dos seringueiros em derrubar uma castanheira, que de qualquer forma é protegida [50].

Embora a castanha e outros produtos florestais (com a borracha como uma exceção notável) careçam de subsídios governamentais, empréstimos ou programas para incentivar a produção (por exemplo, [63]), a pecuária na região tem sido apoiada há muito tempo por meio de investimentos estatais no controle de doenças, desenvolvimento de infraestrutura e uma série de incentivos financeiros, como créditos e subsídios [7,64]. A crescente afinidade cultural e social com o gado no Acre rural se reflete na identificação dos seringueiros, principalmente os mais jovens, com o gado e a pecuária, como evidenciado na apreciação da música sertaneja, comida e roupas de *cowboy* e talvez mais importante, em suas atitudes positivas em relação à pecuária e sua associação com riqueza, prestígio e sucesso [64,65].

Como observamos anteriormente, a pecuária é uma fonte de tensão entre seringueiros e gestores ambientais na RECI, e uma questão de discórdia e debate no que diz respeito à conservação, desenvolvimento e futuro das RESEXs [20,22,66]. A aversão ao gado por gestores ambientais e ambientalistas é compreensível, dado o papel emblemático do gado no programa agressivo de modernização do Brasil pós-1960 e na colonização da Amazônia patrocinada pelo Estado [67], bem como sua contínua e crescente contribuição para o desmatamento [68]. A conversão em larga escala de floresta em pastagem e consequentes deslocamento e violência contra os seringueiros nas décadas de 1970 e 1980 alimentaram a resistência social à pecuária em grande escala, unificando e mobilizando os seringueiros e consolidando sua presença como uma força política regional [29]. No entanto, e isso não é necessariamente contraditório, permanece o fato de que muitos, se não a maioria, das famílias de seringueiros integraram efetivamente o gado em seus portfólios de subsistência e repertórios culturais [20,64], de maneiras que sustentam sua capacidade de manter seu estilo de vida extrativista e permanecer na RESEX.

As contínuas mudanças políticas e econômicas mais amplas complicaram ainda mais a questão e polarizaram as posições em torno do gado. Desde a eleição de Jair Bolsonaro em 2019, o governo federal vem ativamente desmantelando as políticas ambientais e desfinanciando agências de proteção ambiental, como o Instituto Chico Mendes de Conservação da Biodiversidade (ICMBio), ao mesmo tempo em que apoia o desmatamento e o desenvolvimento comercial em larga escala na Amazônia [69]. De maior preocupação para muitos é um novo projeto de lei apresentado pelo governo Bolsonaro em 2020 e atualmente em revisão parlamentar, para retirar a proibição da criação de gado nas RESEXs<sup>16</sup>. Juntamente com as medidas acima mencionadas, isso intensificou os conflitos com ambientalistas e ativistas de direitos humanos e indígenas, nacional e internacionalmente [70].

Como a pecuária continua a ser o principal motor do desmatamento na região [71], a invasão e o desmatamento nas RESEXs aumentaram [72], com muitas RESEXs experimentando taxas crescentes de desmatamento. As taxas médias de desmatamento no RECI, por exemplo, aumentaram 40% em 2018-2019 em relação a 2017 [72]. Na vizinha e icônica Reserva Extrativista Chico Mendes (RECM), o desmatamento durante esse período aumentou em até 131% e é quinze vezes maior que o da RECIER (9.831 ha e 644 ha, respectivamente) [72]. A alta taxa de desmatamento na RECM é impulsionada pelo desenvolvimento das pastagens, embora, como relatamos neste estudo, a castanha e o extrativismo pareçam ajudar a limitar a adoção de gado [34,73]. Existem algumas diferenças fundamentais entre a RECM e a RECI que podem ajudar a explicar as taxas e níveis mais elevados de desmatamento e a expansão da pecuária na primeira: a RECM tem seis vezes mais habitantes e uma densidade demográfica maior do que a RECI, uma



maior densidade de estradas e relação perímetro/área, está mais próxima de grandes centros urbanos e, talvez o mais importante, há um mercado informal e aluguel de terras para pastagens para não moradores [66,74]. Embora o desmatamento geral na RECM permaneça abaixo de 6% [74], a presença de grandes rebanhos de gado contradiz os objetivos do modelo de RESEX, contrasta com a forma como o gado é geralmente criado na RECI e é motivo razoável de preocupação. O contraste entre a RECI e a RECM ilustra a complexidade da questão e da maneira como diferentes variáveis e fatores podem produzir resultados bastante diferentes e, especialmente, a dependência do gado e da agricultura em diferentes comunidades e RESEXs. Essas dinâmicas, como discutiremos a seguir, têm algumas repercussões importantes e colocam questões e dilemas difíceis tanto para os gestores quanto para os seringueiros.

## 5. Conclusões

Apesar da centralidade da castanha para o modelo extrativista e para a identidade social dos seringueiros da RECI, a castanha é – pelo menos em termos de contribuição para a renda familiar – bastante desigual e é fonte de tensão e angústia social e institucional. Semelhante a outras RESEXs amazônicas no Brasil, a RECI opera dentro do que poderia ser descrito como um paradoxo histórico, na medida em que foi criada logo após o momento em que a borracha – peça central da vida e da identidade extrativistas – tornou-se economicamente irrelevante. Esse paradoxo se traduz em vários problemas e dilemas para gestores ambientais e famílias seringueiras, dos quais destacamos dois: primeiro, a necessidade de identificar substitutos adequados – produtos florestais e atividades de base florestal que forneçam uma fonte de renda e que sejam compatíveis com os ideais defendidos pelo modelo de RESEX, que em princípio exclui o corte e a derrubada da floresta. Como vimos, a castanha tornou-se, nesse contexto, a peça central do modelo de RESEX, apesar da falta de subsídios ou apoios formais. No entanto, como importante fonte de renda, a castanha está limitada a algumas comunidades e famílias. A desigual distribuição e acesso à castanha, objeto principal deste estudo, ilustra o segundo aspecto do já mencionado paradoxo histórico, pelo qual a distribuição das unidades fundiárias e dos direitos de acesso – como evidenciado pelas colocações voltadas para a borracha – estão desalinhados quando se trata de outros produtos florestais e suas diferentes distribuições espaciais.

Nosso artigo buscou compreender e enquadrar as escolhas e estratégias extrativistas em nível familiar e comunitário dentro desses dois grandes desafios, e é dentro desse paradoxo que vemos emergir conflitos e tensões em curso entre famílias seringueiras e gestores ambientais e dentro do modelo de RESEX de forma geral. Apesar da amostra um tanto limitada, nosso estudo ilustra até que ponto as regras e mecanismos criados localmente são capazes de mitigar parcialmente os efeitos de acesso e distribuição desiguais, ampliando o acesso e baseando-se no complexo conjunto de direitos, obrigações, meios, relações e processos [8] que sustentam as relações sociais, políticas e econômicas do seringueiro e a sociedade.

Na medida em que se adaptam, respondem e refletem as condições de heterogeneidade, diversidade e dinamismo que caracterizam a paisagem ecológica, econômica e política mais ampla – com suas incertezas incorporadas – tais instituições e mecanismos locais parecem contribuir para a resiliência mais ampla do sistema socioecológico [28,75]. Tal flexibilidade no tempo e no espaço, no entanto, é muitas vezes difícil de conciliar com a rigidez do quadro legislativo [76], levantando questões quanto à eficácia das formas centralizadas de controle e governança do Estado [77] e apoiando os apelos por mais nuances, incluindo formas multidimensionais e multiníveis de governança e controle de recursos [78,79].

Apesar dos efeitos atenuantes dos regimes de acesso *de facto* através de instituições sociais como a meia, a verdade é que muitas famílias e algumas comunidades enfrentam desafios e incertezas consideráveis. Os desafios impostos pelo acesso desigual à castanha podem, previsivelmente, continuar a se intensificar ao longo do tempo, especialmente à

luz das aceleradas e perigosas mudanças climáticas e ambientais regionais e locais [80,81], e devem, portanto, ser devidamente priorizadas na formulação de políticas e intervenções com foco nos meios de subsistência [5]. Nosso estudo também ilustra que os investimentos em diferentes atividades econômicas, incluindo a pecuária e a colheita da castanha, são feitos como parte de decisões complexas envolvendo um conjunto heterogêneo de atividades econômicas, restrições e oportunidades. Para compreender plenamente – e, portanto, promover – a castanha e o extrativismo florestal de forma mais geral como uma ferramenta de geração de renda sustentável e resultados de conservação baseados na floresta, é necessário considerar também o importante papel desempenhado por outras atividades econômicas em permitir aos seringueiros a sua permanência na Reserva. Os meios de subsistência dos seringueiros consistem em sistemas integrados e complexos – que compreendem arranjos de acesso que são moldados e tornados mais flexíveis e adaptáveis por meio de relações de parentesco e sociais [10,75] – e estes também precisam ser entendidos e considerados como tal. Os desafios para a ciência e a política refletirem, representarem e responderem adequadamente a essas realidades complexas e mutáveis, particularmente considerando a aceleração das mudanças sociais e ambientais, são significativos, o que novamente sugere a necessidade de incluir respostas mais flexíveis e específicas ao contexto.

Embora nosso estudo não tenha abordado diretamente o nível de diversificação de famílias individuais, nossas observações e resultados preliminares sugerem que a agricultura de mandioca e pecuária de pequena escala podem não ser necessariamente antagônicas, e podem até complementar a colheita de castanha e apoiar o modelo extrativista na medida em que (1) as áreas das primeiras não se sobreponham à da última, (2) as roças e pastagens permaneçam em pequena escala, e (3) possam contribuir para a segurança econômica dos seringueiros e, nesse sentido, à viabilidade social de longo prazo de suporte às rendas e modos de vida baseados nas florestas.

**Contribuição dos autores:** Conceitualização, M.A. e B.U.; metodologia, M.A. e B.U.; análise formal, B.U. e M.A.; investigação, B.U.; curadoria de dados, B.U.; redação—preparação do rascunho original, B.U. e M.A.; redação—revisão e edição, M.A. e B.U.; supervisão, M.A. Todos os autores leram e concordaram com a versão publicada do manuscrito.

**Financiamento:** Esta pesquisa foi financiada pelo Instituto Durrell de Conservação e Ecologia (DICE), Universidade de Kent, no âmbito do Programa de Mestrado em Conservação e Desenvolvimento Rural. Também recebemos apoio logístico do Instituto Chico Mendes de Conservação da Biodiversidade (ICMBio) e financeiro do Departamento de Antropologia da Universidade da Geórgia.

**Declaração do Conselho de Revisão Institucional:** Este estudo foi conduzido de acordo com a Declaração de Helsinque e aprovado pelo Comitê de Ética da Escola de Antropologia e Conservação da Universidade de Kent (aprovado em 11 de maio de 2015). Esta pesquisa foi aprovada pelo ICMBio por meio do Sistema Brasileiro de Informações sobre Biodiversidade (SISBIO) sob o número de autorização 49953.

**Declaração de Consentimento Informado:** O consentimento informado foi obtido de todos os sujeitos envolvidos no estudo.

**Declaração de disponibilidade de dados:** Parte dos dados apresentados neste estudo estão disponíveis abertamente no Open Science Framework (OSF) em <https://doi.org/10.17605/OSF.IO/TPE9X>, acessado em 22 de junho de 2022.

**Agradecimentos:** Somos profundamente gratos a todos os participantes do nosso estudo, que generosamente compartilharam seu tempo e suas histórias. Somos muito gratos a Tiago Ranzi e Aldeci Maia (Nenzinho) pelo apoio instrumental no trabalho de campo. Gostaríamos de agradecer os participantes do Workshop de Governança de Recursos Naturais do Brasil na Conferência de Conservação Integrativa 2020 (Universidade da Geórgia) pelos comentários sobre uma versão anterior. Agradecemos também aos três revisores anônimos por seus comentários e sugestões, que

contribuíram para melhorar este artigo. Finalmente, somos gratos a Carolina Guyot por nos fazer uma ilustração e a Fabio Benez-Secanho pela ajuda com o mapa.

**Conflitos de interesse:** Os autores declaram não haver conflito de interesse.

### Apêndice S1 - Guia de entrevista sobre castanha do brasil

#### Colheita

1. Quem é o dono da castanha que você colhe?
2. Como é organizada a colheita (em termos de divisão de trabalho e benefícios)? As mulheres colhem?
3. Como você transporta as castanhas?

#### Produção

4. Quantas castanhas/árvores você colhe?
5. Existe alguma variabilidade na produção (por exemplo, entre árvores ou anos)?
6. Quanto você colheu este ano (2015)? Quanto você colheu no ano passado (2014)?

#### Vendas

7. Você vende sua produção de castanha? Se sim, a quem?
8. Por quanto você vendeu sua produção este ano (2015)? Por quanto você vendeu sua produção no ano passado (2014)?
9. Você vende sua produção individual ou coletivamente?
10. Você recebe algum adiantamento em dinheiro antes da colheita?

### Notas

- <sup>1</sup> Singular: colocação.
- <sup>2</sup> O ator estatal mais importante na área é o Instituto Chico Mendes de Conservação da Biodiversidade (ICMBio) – uma instituição federal vinculada ao Ministério do Meio Ambiente.
- <sup>3</sup> Desde então, o primeiro autor retornou à área por um total de quatro meses.
- <sup>4</sup> O viés de gênero em nossa amostra reflete o fato de que os homens geralmente são considerados chefes de família, mas também que o gênero do primeiro autor tornou mais difícil entrevistar as mulheres, embora as mulheres, geralmente as esposas dos chefes da família, estivessem frequentemente presentes e interviessem durante as entrevistas. Ainda assim, nosso estudo pode ter falhado em capturar importantes dinâmicas intra-familiares, incluindo o acesso das mulheres a recursos, vasto conhecimento e uso de plantas, bem como atividades geradoras de renda (por exemplo, [42]). Esperamos que novos estudos sejam capazes de abordar explicitamente os papéis e relatos das mulheres em relação aos temas estudados.
- <sup>5</sup> A faixa e a idade mediana (em anos) dos entrevistados em cada uma das três comunidades são: A (mínimo = 20, máximo = 70, mediana = 40); B (mínimo = 23, máximo = 75, mediana = 45); comunidade C (mínimo = 20, máximo = 57, mediana = 30).
- <sup>6</sup> As questões referentes a safras, preços dos produtos e importância econômica das atividades referem-se aos anos de 2015 e 2014. Os valores monetários em Reais (BRL) foram convertidos para Dólares Americanos (USD) utilizando a taxa de 23 de maio de 2015: USD 1 = R\$ 3,07.
- <sup>7</sup> Ao usar indicadores como “presença na estratégia de meios de subsistência” e “fonte primária de renda”, procuramos fornecer uma descrição básica das estratégias de subsistência para focar na relação entre acesso diferencial à castanha e diversificação de meios de subsistência.
- <sup>8</sup> Os termos locais são: “dono de castanha”, “pessoa que quebra castanha de meia” (ou seja, usuário autorizado), e “pessoa que não tem castanha” (ou seja, sem acesso).
- <sup>9</sup> Estradas ficam inoperantes durante o inverno devido à alta pluviosidade. Por outro lado, altos níveis de água em córregos e rios no mesmo período facilitam a navegação.
- <sup>10</sup> Poucas famílias plantam a castanheira porque a maioria acha que as árvores demoram muito para produzir.
- <sup>11</sup> Existem também diferenças consideráveis de produtividade entre árvores e povoamentos.
- <sup>12</sup> A comunidade A em nossa amostra é uma exceção a essa tendência geral. Por razões que são elaboradas na discussão, áreas produtivas de floresta foram parceladas para famílias externas como parte de um processo interno de divisão da terra na década de 1990.
- <sup>13</sup> Embora os direitos à terra (colocações) e seus recursos sejam formalmente registrados no órgão ambiental (ICMBio), os arranjos sobre a colheita da castanha são realizados informalmente entre as famílias.
- <sup>14</sup> O esquema permite que um grupo de 17 coletores participe e compartilhe a colheita da castanha de propriedade de três proprietários por meio do sistema de meia. Os pedidos de acesso por parte das famílias a esse regime específico são discutidos

e decididos por consenso em reuniões entre os coletores e um coordenador nomeado. Proprietários ou indivíduos com fontes de renda seguras, como professores, são excluídos do esquema.

<sup>15</sup> Isso não significa que os castanhais menores sejam “sem importância” ou subvalorizados; precisamente porque não são comercializáveis, são importantes para o consumo local, partilha e subsistência.

<sup>16</sup> Projeto de Lei 313, 2020 (<https://www.camara.leg.br/proposicoesWeb/fichadetramitacao?idProposicao=2237320>, acessado em 20 de junho de 2022), atualizado pela última vez em 18 de agosto de 2021. O projeto precisa passar por vários níveis de análise parlamentar antes de ser submetido à aprovação do presidente.

## Referências

1. Brondizio, E. The Global Açaí: A Chronicle of Possibilities and Predicaments of an Amazonian Superfood. In *Critical Approaches to Superfoods*; McDonnell, E., Wilk, R., Eds.; Bloomsbury Academic: London, UK; New York, NY, USA; Oxford, UK; New Delhi, India; Sydney, Australia, 2020.
2. Guariguata, M.R.; Cronkleton, P.; Duchelle, A.E.; Zuidema, P.A. Revisiting the ‘cornerstone of Amazonian conservation’: A socioecological assessment of Brazil nut exploitation. *Biodivers. Conserv.* **2017**, *26*, 2007–2027. <https://doi.org/10.1007/s10531-017-1355-3>.
3. Kainer, K.A.; Wadt, L.H.O.; Staudhammer, C.L. The evolving role of *Bertholletia excelsa* in Amazonia: Contributing to local livelihoods and forest conservation. *Desenvolv. E Meio Ambiente* **2018**, *48*, 477–497. <https://doi.org/10.5380/dma.v48i0.58972>.
4. Scoles, R.; Gribel, R. Human Influence on the Regeneration of the Brazil Nut Tree (*Bertholletia excelsa* Bonpl., *Lecythidaceae*) at Capanã Grande Lake, Manicoré, Amazonas, Brazil. *Hum. Ecol.* **2015**, *43*, 843–854. <https://doi.org/10.1007/s10745-015-9795-4>.
5. Zeidemann, V.; Kainer, K.A.; Staudhammer, C.L. Heterogeneity in NTFP quality, access and management shape benefit distribution in an Amazonian extractive reserve. *Environ. Conserv.* **2013**, *41*, 242–252. <https://doi.org/10.1017/s0376892913000489>.
6. Myers, R.; Hansen, C.P. Revisiting A Theory of Access: A review. *Soc. Nat. Resour.* **2020**, *33*, 146–166. <https://doi.org/10.1080/08941920.2018.1560522>.
7. Salisbury, D.S.; Schmink, M. Cows versus rubber: Changing livelihoods among Amazonian extractivists. *Geoforum* **2007**, *38*, 1233–1249. <https://doi.org/10.1016/j.geoforum.2007.03.005>.
8. Ribot, J.C.; Peluso, N.L. A Theory of Access. *Rural. Sociol.* **2003**, *68*, 29.
9. Peluso, N.L.; Ribot, J. Postscript: A Theory of Access Revisited. *Soc. Nat. Resour.* **2020**, *33*, 300–306. <https://doi.org/10.1080/08941920.2019.1709929>.
10. Castro, F. Patterns of Resource Use by Caboclo Communities in the Middle-Lower Amazon. In *Amazon Peasant Societies in a Changing Environment*; Adams, C., Murrieta, R., Neves, W., Harris, M., Eds.; Springer: Dordrecht, Netherlands, 2009. 10.1007/978-1-4020-9283-1\_8pp. 157–177.
11. Calderón-Contreras, R.; White, C.S. Access as the Means for Understanding Social-Ecological Resilience: Bridging Analytical Frameworks. *Soc. Nat. Resour.* **2019**, *33*, 205–223. <https://doi.org/10.1080/08941920.2019.1597233>.
12. Allegratti, M.H. Extractive reserves: An alternative for reconciling development and environmental conservation in Amazonia. In *Alternatives to Deforestation: Steps toward Sustainable Use of the Amazonia Rain Forest*; Anderson, A.B., Ed.; Columbia University Press: New York, NY, USA, 1990; pp. 252–264.
13. Schwartzman, S. Extractive Reserves: The Rubber Tappers’ Strategy for Sustainable Use of the Amazon Rain Forest. In *Fragile Lands in Latin America: Strategies for Sustainable Development*; Browder, J.O., Ed.; Westview Press: Boulder, CO1989; pp. 150–165.
14. Schmink, M.; Duchelle, A.; Hoelle, J.; Leite, F.; d’Oliveira, M.V.; Vadjunec, J.; Valentim, J.; Wallace, R. Forest Citizenship in Acre, Brazil. In *Forests under Pressure—Local Responses to Global Issues*; Katila, P., Galloway, G., Jong, W.D., Pacheco, P., Mery, G., Eds.; IUFRO: Vienna, Austria, 2014; Volume 32, p. 17.
15. Cronkleton, P.; Taylor, P.L.; Barry, D.; Stone-Jovicich, S.; Schmink, M. *Environmental Governance and the Emergence of Forest-Based Social Movements*; CIFOR: Bogor, Indonesia, 2008; p. 44.
16. Shepard, G.H.; Ramirez, H. “Made in Brazil”: Human Dispersal of the Brazil Nut (*Bertholletia excelsa*, *Lecythidaceae*) in Ancient Amazonia. *Econ. Bot.* **2011**, *65*, 44–65. <https://doi.org/10.1007/s12231-011-9151-6>.
17. Duchelle, A.E.; Cronkleton, P.; Kainer, K.A.; Guanacoma, G.; Gezan, S. Resource Theft in Tropical Forest Communities: Implications for Non-timber Management, Livelihoods, and Conservation. *Ecol. Soc.* **2011**, *16*, 20.
18. Staudhammer, C.L.; Wadt, L.H.O.; Kainer, K.A.; da Cunha, T.A. Comparative models disentangle drivers of fruit production variability of an economically and ecologically important long-lived Amazonian tree. *Sci. Rep.* **2021**, *11*, 2563. <https://doi.org/10.1038/s41598-021-81948-4>.
19. Ruiz-Pérez, M.; Almeida, M.; Dewi, S.; Costa, E.M.L.; Pantoja, M.C.; Puntodewo, A.; Postigo, A.d.A.; de Andrade, A.G. Conservation and Development in Amazonian Extractive Reserves: The Case of Alto Juruá. *Ambio* **2005**, *34*, 218–223.
20. Gomes, C.V.A.; Perz, S.G.; Vadjunec, J.M. Convergence and Contrasts in the Adoption of Cattle Ranching: Comparisons of Smallholder Agriculturalists and Forest Extractivists in the Amazon. *J. Lat. Am. Geogr.* **2012**, *11*, 99–120. <https://doi.org/10.1353/lag.2012.0018>.
21. Schwartzman, S. Chico Mendes, the rubber tappers and the Indians: Reimagining conservation and development in the Amazon. *Desenvolvimento e Meio Ambiente* **2018**, *48*, 56–73. <https://doi.org/10.5380/dma.v48i0.58829>.
22. Wallace, R.H.; Gomes, C.V.A.; Cooper, N.A. The Chico Mendes Extractive Reserve: Trajectories of agro-extractive development in Amazonia. *Desenvolvimento e Meio Ambiente* **2018**, *48*, 184–213. <https://doi.org/10.5380/dma.v48i0.58836>.

23. Shepherd, G.; Warner, K.; Hogarth, N. Forests and poverty: How has our understanding of the relationship been changed by experience? *Int. For. Rev.* **2020**, *22*, 15.
24. Antunes, A.; Simmons, C.S.; Veiga, J.P. Non-Timber Forest Products and the Cosmetic Industry: An Econometric Assessment of Contributions to Income in the Brazilian Amazon. *Land* **2021**, *10*, 1–16. <https://doi.org/10.3390/land10060588>.
25. Ostrom, E. *Governing the Commons: The Evolution of Institutions for Collective Action*; Cambridge University Press: Cambridge, UK, 1990.
26. Schlager, E.; Ostrom, E. Property-Rights Regimes and Natural Resources: A Conceptual Analysis. *Land Econ.* **1992**, *68*, 249–262.
27. Alexiades, M.N.; Shanley, P. Forest Products, Livelihoods and Conservation: Case Studies of Non-Timber Forest Product Systems. In *Forest Products, Livelihoods and Conservation: Case Studies of Non-timber Forest Product Systems*; Alexiades, M.N., Shanley, P., Eds.; CIFOR: Bogor, Indonesia, 2005.
28. Vogt, N.D.; Pinedo-Vasquez, M.; Brondízio, E.S.; Almeida, O.; Rivero, S. Forest Transitions in Mosaic Landscapes: Smallholder's Flexibility in Land-Resource Use Decisions and Livelihood Strategies From World War II to the Present in the Amazon Estuary. *Soc. Nat. Resour.* **2015**, *28*, 1043–1058. <https://doi.org/10.1080/08941920.2015.1014603>.
29. Allegretti, M. The social construction of public policies—Chico Mendes and the seringueiros movement. *Desenvolv. E Meio Ambiente* **2008**, *18*, 39–59.
30. Fearnside, P.M. Extractive Reserves in Brazilian Amazonia. *BioScience* **1989**, *39*, 387–393.
31. Vadjunec, J.M.; Rocheleau, D. Beyond Forest Cover: Land Use and Biodiversity in Rubber Trail Forests of the Chico Mendes Extractive Reserve. *Ecol. Soc.* **2009**, *14*, 22.
32. Pantoja, M.C. 'Vegetal Leather': Latex (*Hevea brasiliensis* Müll. Arg.) in style. In *Forest Products, Livelihoods and Conservation: Case Studies of Non-Timber Forest Product Systems*; Alexiades, M., Shanley, P., Eds.; CIFOR: Bogor, Indonesia, 2004; Volume 3, p. 17.
33. Almeida, M.W.B.d. Direitos à floresta e ambientalismo: Seringueiros e suas lutas. *Rev. Bras. De Ciências Sociais* **2004**, *19*, 21.
34. Vadjunec, J.M.; Gomes, C.V.A.; Ludewigs, T. Land-use/land-cover change among rubber tappers in the Chico Mendes Extractive Reserve, Acre, Brazil. *J. Land Use Sci.* **2009**, *4*, 249–274. <https://doi.org/10.1080/17474230903222499>.
35. Sills, E.; Saha, S. Subsidies for Rubber: Conserving Rainforests While Sustaining Livelihoods in the Amazon? *J. Sustain. For.* **2010**, *29*, 152–173. <https://doi.org/10.1080/10549810903543907>.
36. Schmink, M. Forest citizens: Changing Life Conditions and Social Identities in the Land of the Rubber Tappers. *Lat. Am. Res. Rev.* **2011**, *46*, 18.
37. ICMBio. *Plano de Manejo da Reserva Extrativista do Cazumbá-Iracema*; MMA, Ed.; MMA: Sena Madureira, Brazil, 2007; p. 206.
38. Pinedo-Vasquez, M.; Padoch, C. Urban, rural and in-between: Multi-sited households, mobility and resource management in the Amazon flood plain. In *Mobility and Migration in Indigenous Amazonia: Contemporary Ethnoecological Perspectives*; Alexiades, M.N., Ed.; Berghahn: Oxford, UK; New York, NY, USA, 2009; pp. 86–96.
39. IBGE. *Mapa Exploratório de Solos: Estado do Acre*; IBGE: Brasília, Brazil, 2005.
40. Bernard, H.R. *Research Methods in Anthropology: Qualitative and Quantitative Approaches*, 6th Ed.; Rowman & Littlefield: Lanham, USA, 2018.
41. Weller, S.C.; Vickers, B.; Bernard, H.R.; Blackburn, A.M.; Borgatti, S.; Gravlee, C.C.; Johnson, J.C. Open-ended interview questions and saturation. *PLoS ONE* **2018**, *13*, e0198606. <https://doi.org/10.1371/journal.pone.0198606>.
42. Kainer, K.A.; Duryea, M.L. Tapping Women's Knowledge: Plant Resource Use in Extractive Reserves, Acre, Brazil. *Econ. Bot.* **1992**, *46*, 18.
43. Ortiz, E.G. Brazil nut (*Bertholletia excelsa*). In *Tapping the Green Market: Certification and Management of Non-Timber Forest Products*; Shanley, P., Pierce, A.R., Laird, S.A., Guillen, A., Eds.; Earthscan: London, UK, 2002; pp. 61–74.
44. Duchelle, A.E.; Almeyda Zambrano, A.M.; Wunder, S.; Börner, J.; Kainer, K.A. Smallholder Specialization Strategies along the Forest Transition Curve in Southwestern Amazonia. *World Dev.* **2014**, *64*, S149–S158. <https://doi.org/10.1016/j.worlddev.2014.03.001>.
45. Hecht, S.B. Factories, Forests, Fields and Family: Gender and Neoliberalism in Extractive Reserves. *J. Agrar. Chang.* **2007**, *7*, 316–347.
46. Belcher, B.; Schreckenberger, K. Commercialisation of Non-timber Forest Products: A Reality Check. *Dev. Policy Rev.* **2007**, *25*, 355–377.
47. Homma, A.K.O. *Colhendo da Natureza: O Extrativismo Vegetal na Amazônia*; Embrapa: Brasília, Brazil, 2018; pp. 219.
48. Virapongse, A. Social Mechanisms and Mobility: Buriti Palm (*Mauritia flexuosa*) Extractivism in Brazil. *Hum. Ecol.* **2017**, *45*, 119–129. <https://doi.org/10.1007/s10745-016-9887-9>.
49. Castro, F.d. Local politics of floodplain tenure in the Amazon. *Int. J. Commons* **2016**, *10*, 1–20. <https://doi.org/10.18352/ijc.472>.
50. Kainer, K.; Cymerys, M.; Wadt, L.; Argolo, V. Brazil nut. In *Fruit Trees and Useful Plants in Amazonian life*; Shanley, P., Cymerys, M., Serra, M., Medina, G., Eds.; FAO, CIFOR and People and Plants International: Rome, Italy, 2011; p. 380.
51. Zenteno, M.; Zuidema, P.A.; de Jong, W.; Boot, R.G.A. Livelihood strategies and forest dependence: New insights from Bolivian forest communities. *For. Policy Econ.* **2013**, *26*, 12–21. <https://doi.org/10.1016/j.forpol.2012.09.011>.
52. Stoian, D. Harvesting windfalls: The Brazil nut (*Bertholletia excelsa*) economy in the Bolivian Amazon. In *Forest Products, livelihoods and Conservation. Case Studies of Non-Timber Forest Product Systems*; Alexiades, M.N., Shanley, P., Eds.; CIFOR: Bogor, Indonesia, 2005; Volume 3, pp. 83–110.
53. Ribot, J.C. Theorizing Access: Forest Profits along Senegal's Charcoal Commodity Chain. *Dev. Chang.* **1998**, *29*, 307–341.
54. Morin, E. *Introduction à la Pensée Complexe*; Editions Du Seuil: Paris, France, 2014; pp. 160.

55. Overing, J.; Passes, A. *The Anthropology of Love and Anger: The Aesthetics of Conviviality in Native Amazonia*; Routledge: New York, NY, USA, 2000.
56. Harris, M. The Rhythm of Life on the Amazon Floodplain: Seasonality and Sociality in a Riverine Village. *J. R. Anthropol. Inst.* **1998**, *4*, 65–82.
57. Barber, C.P.; Cochrane, M.A.; Souza, C.M.; Laurance, W.F. Roads, deforestation, and the mitigating effect of protected areas in the Amazon. *Biol. Conserv.* **2014**, *177*, 203–209. <https://doi.org/10.1016/j.biocon.2014.07.004>.
58. Schielein, J.; Ponzoni Frey, G.; Miranda, J.; Souza, R.A.d.; Boerner, J.; Henderson, J. The role of accessibility for land use and land cover change in the Brazilian Amazon. *Appl. Geogr.* **2021**, *132*, 1–11. <https://doi.org/10.1016/j.apgeog.2021.102419>.
59. Pérez, D.; Mora, R.; López Carrascal, C. Conservación de la diversidad de yuca en los sistemas tradicionales de cultivo de la Amazonía. *Acta Biológica Colomb.* **2019**, *24*, 202–212. <https://doi.org/10.15446/abc.v24n2.75428>.
60. Walker, R.; Moran, E.; Anselin, L. Deforestation and Cattle Ranching in the Brazilian Amazon: External Capital and Household Processes. *World Dev.* **2000**, *28*, 683–699.
61. Escobar, J.; Aldana, U. Are Nontimber Forest Products the Antidote to Rainforest Degradation? Brazil Nut Extraction in Madre De Dios, Peru. *World Dev.* **2003**, *31*, 1873–1887. <https://doi.org/10.1016/j.worlddev.2003.08.001>.
62. Soriano, M.; Mohren, F.; Ascarrunz, N.; Dressler, W.; Pena-Claros, M. Socio-ecological costs of Amazon nut and timber production at community household forests in the Bolivian Amazon. *PLoS ONE* **2017**, *12*, e0170594. <https://doi.org/10.1371/journal.pone.0170594>.
63. Brondizio, E.; Safar, C.; Siqueira, A. The urban market of Acai fruit (*Euterpe oleracea* Mart.) and rural land use change: Ethnographic insights into the role of price and land tenure constraining agricultural choices in the Amazon estuary. *Urban Ecosyst.* **2002**, *6*, 67–97.
64. Hoelle, J. Convergence on Cattle: Political Ecology, Social Group Perceptions, and Socioeconomic Relationships in Acre, Brazil. *Cult. Agric. Food Environ.* **2011**, *33*, 95–106. <https://doi.org/10.1111/j.2153-9561.2011.01053.x>.
65. Hoelle, J. A chegada da Cultura Caubói no Acre, Brasil. *Cad. De Geogr.* **2020**, *30*, 461–483. <https://doi.org/10.5752/P.2318-2962.2020v30nesp3p461>.
66. Kröger, M. Deforestation, cattle capitalism and neodevelopmentalism in the Chico Mendes Extractive Reserve, Brazil. *J. Peasant Stud.* **2019**, *47*, 464–482. <https://doi.org/10.1080/03066150.2019.1604510>.
67. Hecht, S.B.; Cockburn, A. *The Fate of the Forest: Developers, Destroyers, and Defenders of the Amazon*; Updated Edition; University of Chicago Press: Chicago, IL, USA, 2011.
68. Santos, A.M.D.; Silva, C.; Almeida Junior, P.M.; Rudke, A.P.; Melo, S.N. Deforestation drivers in the Brazilian Amazon: Assessing new spatial predictors. *J. Env. Manag.* **2021**, *294*, 113020. <https://doi.org/10.1016/j.jenvman.2021.113020>.
69. Ferrante, L.; Fearnside, P.M. Brazil's new president and 'ruralists' threaten Amazonia's environment, traditional peoples and the global climate. *Environ. Conserv.* **2019**, *46*, 261–263. <https://doi.org/10.1017/s0376892919000213>.
70. Tourneau, F.-M.L. O governo Bolsonaro contra os Povos Indígenas: As garantias constitucionais postas à prova. *Confins* **2019**, *501*, 1–17. <https://doi.org/10.4000/confins.22413>.
71. Pereira, R.; Rausch, L.L.; Carrara, A.; Gibbs, H.K. Extensive Production Practices and Incomplete Implementation Hinder Brazil's Zero-Deforestation Cattle Agreements in Pará. *Trop. Conserv. Sci.* **2020**, *13*, 1–13. <https://doi.org/10.1177/1940082920942014>.
72. ISA. Unidades de Conservação no Brasil. Available online: <https://uc.socioambiental.org/> (accessed on 4 September 2021).
73. Sessin-Dilascio, K.; Souza, T.S.; Rossi, C.B.; Sinisgalli, P.A.D.A. As Fronteiras entre Homem-Gado-Floresta. In Proceedings of the X Encontro Nacional da Anppas, Campinas, Brazil, 5 October 2021.
74. Mascarenhas, F.D.S.; Brown, I.F.; Silva, S.S.d. Desmatamento e incêndios florestais transformando a realidade da Reserva Extrativista Chico Mendes. *Desenvolv. E Meio Ambiente* **2018**, *48*, 236–262. <https://doi.org/10.5380/dma.v48i0.58826>.
75. Futemma, C. The Use of and Access to Forest Resources: The Caboclos of the Lower Amazon and Their Socio-Cultural Attributes. In *Amazon Peasant Societies in a Changing Environment*; Springer: Dordrecht, Netherlands, 2009. [https://doi.org/10.1007/978-1-4020-9283-1\\_10pp](https://doi.org/10.1007/978-1-4020-9283-1_10pp). 215–237.
76. Ostrom, E. Polycentric systems for coping with collective action and global environmental change. *Glob. Environ. Chang.* **2010**, *20*, 550–557. <https://doi.org/10.1016/j.gloenvcha.2010.07.004>.
77. Laird, S.A.; McLain, R.J.; Wynberg, R.P. *Wild Product Governance: Finding Policies that Work for Non-Timber Forest Products*; Earthscan: London, UK; Washington, DC, USA, 2010; p. 393.
78. Brondizio, E.S.; Ostrom, E.; Young, O.R. Connectivity and the Governance of Multilevel Social-Ecological Systems: The Role of Social Capital. *Annu. Rev. Environ. Resour.* **2009**, *34*, 253–278. <https://doi.org/10.1146/annurev.enviro.020708.100707>.
79. Nagendra, H.; Ostrom, E. Polycentric governance of multifunctional forested landscapes. *Int. J. Commons* **2012**, *6*, 104–133.
80. Boulton, C.A.; Lenton, T.M.; Boers, N. Pronounced loss of Amazon rainforest resilience since the early 2000s. *Nat. Clim. Chang.* **2022**, *12*, 271–278. <https://doi.org/10.1038/s41558-022-01287-8>.
81. Sales, L.P.; Rodrigues, L.; Masiero, R.; Hampe, A. Climate change drives spatial mismatch and threatens the biotic interactions of the Brazil nut. *Glob. Ecol. Biogeogr.* **2020**, *30*, 117–127. <https://doi.org/10.1111/geb.13200>.
